# Supplementary material for: miR-10a increases the cisplatin resistance of lung adenocarcinoma circulating tumor cells via targeting PIK3CA in the PI3K/Akt pathway
Source: PubMed Central journal article supplement — Oncol Rep. 2020 Mar 17;43(6):1906–14. doi: 10.3892/or.2020.7547 (PMC7160533; doi:10.3892/or.2020.7547), 2020-03-17

Figure S1. Quantification of the expression of PIK3CA and the activation of the PI3K/Akt signaling pathway as determined by western blotting in A549 and H1299 cells and CTCs. CTCs were isolated from the blood samples obtained from 6 lung adenocarcinoma patients. PIK3CA, phosphatidylinositol-4,5-bisphosphate 3-kinase catalytic subunit  $\alpha$ ; PI3K, phosphoinositide 3-kinase; pAkt, phosphorylated protein kinase B; CTCs, circulating tumor cells.

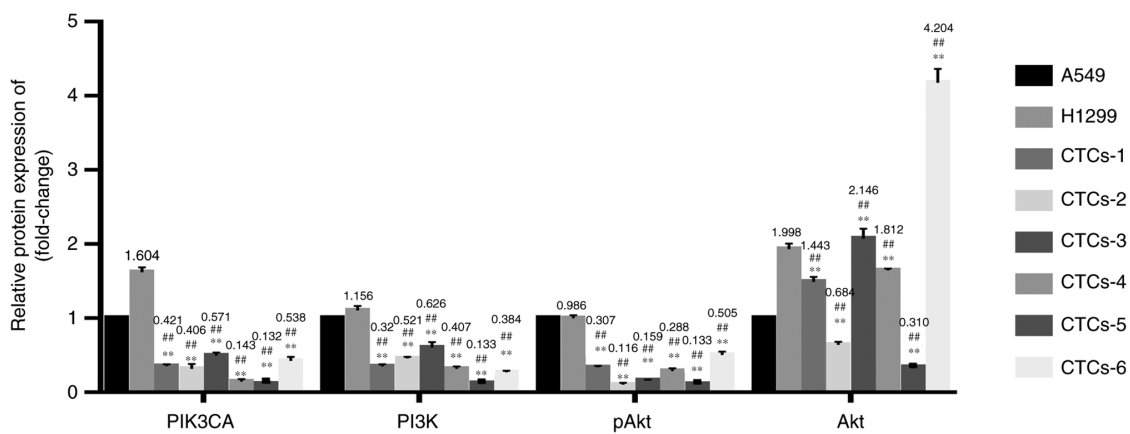

Supplement: Supplementary_Data.pdf [file Supplementary_Data.pdf]
